# Supplementary material for: Phosphorylated (pT371)TRF1 is recruited to sites of DNA damage to facilitate homologous recombination and checkpoint activation
Source: PubMed Central journal article supplement (PMC3905873; doi:10.1093/nar/gkt775), 2013-08-30

## SUPPLEMENTARY FIGURE LEGENDS

**Figure 1.** Phosphorylated (pT371)TRF1 forms damage-induced foci in cells treated with IR, camptothecin or etoposide. **(A)** Indirect immunofluorescence with anti-pT371 antibody. SV40-transformed GM637 skin fibroblasts were mock treated or treated with 12 Gy IR. Cell nuclei were stained with DAPI in blue. **(B)** Indirect immunofluorescence with anti-pT371 antibody. Telomerase-immortalized BJ (hTERT-BJ) cells were mock treated or treated with 12 Gy IR. Cell nuclei were stained with DAPI in blue. **(C)** Indirect immunofluorescence with anti-pT371 antibody on HeLaII cells treated with camptothecin or etoposide. Cell nuclei were stained with DAPI in blue. **(D)** Quantification of the percentage of HeLaII cells with five or more damage-induced (pT371)TRF1 foci. Standard deviation from three independent experiments are indicated. CPT: camptothecin; Etop: etoposide.

**Figure 2.** TRF1 carrying an amino acid substitution of R425V is defective in localizing to telomeres *in vivo*. IF-FISH with anti-Myc antibody (red) in conjunction with FITC-conjugated-(C<sub>3</sub>TA<sub>2</sub>)<sub>3</sub> PNA probe (green) was performed with HT1080 cells overexpressing either Myc-tagged wild type TRF1 or Myc-tagged TRF1-R425V. Cell nuclei were stained with DAPI in blue.

**Figure 3.** Overexpression of TRF1 carrying a nonphosphorylatable mutation of T371A impairs the activation of the G2/M checkpoint and fails to promote cell survival following the treatment with DSB-inducing agents. **(A)** Quantification of the percentage of cells stained positive for H3-pS10. HT1080 cells stably expressing the vector alone or various TRF1 alleles as indicated were mock treated or treated with 12 Gy IR. For each cell line, a total of 3000 cells were scored in blind. Standard deviations from three independent experiments are indicated. **(B & C)** Clonogenic survival assays following various doses of IR (B) or camptothecin (C). The colony forming assays were performed with HT1080 cells overexpressing the vector alone or various Myc-tagged TRF1 alleles as indicated. Standard deviations

from at least three independent experiments are indicated. **(D)** Western analysis of HT1080 cells overexpressing the vector alone or various Myc-tagged TRF1 alleles as indicated. Immunoblotting was performed with anti-Myc or anti- $\gamma$ -tubulin antibody.

**Figure 4.** Depletion or loss of ATM impairs the formation of IR-induced (pT371)TRF1 foci. **(A)** Indirect immunofluorescence with anti-pT371 antibody on IR-treated HeLaII cells knocked down for ATM. Cell nuclei were stained with DAPI in blue. **(B)** Quantification of the percentage of cells with five or more IR-induced (pT371)TRF1 foci in HeLaII cells with or without depletion of ATM from (A). Standard deviation from three independent experiments are indicated. **(C)** Western analysis of HeLaII cells with or without knockdown of ATM. Immunoblotting was performed with anti-ATM, anti-pT371, anti-TRF1 or anti- $\gamma$ -tubulin antibody. **(D)** Indirect immunofluorescence with anti-pT371 antibody on IR-treated ATM-deficient cells complemented with either the vector alone (GM16666) or ATM (GM16667). Cell nuclei were stained with DAPI in blue. **(E)** Quantification of the percentage of cells with five or more IR-induced (pT371)TRF1 foci from (D). Standard deviations from three independent experiments are indicated. **(F)** Western analysis of ATM-deficient cells complemented with the vector alone or ATM. Immunoblotting was performed with anti-pT371, anti-TRF1 or anti- $\gamma$ -tubulin.

**Figure 5.** The Mre11/Rad50/Nbs1 is required for the formation of IR-induced (pT371)TRF1 foci. **(A)** Indirect immunofluorescence with anti-ATM-pS1981 antibody. HeLaII cells pretreated with DMSO or Mirin were radiated with 12 Gy IR and then fixed 1 hr post IR. **(B)** Quantification of the percentage of cells with five or more IR-induced ATM-pS1981 foci (A). Standard deviations from three independent experiments are indicated. **(C)** Indirect immunofluorescence with anti-pT371 antibody. HeLaII cells pretreated with DMSO or Mirin were radiated with 12 Gy IR and then fixed 8 hr post IR. **(D)** Western analysis. Prior to 12 Gy IR, HeLaII cell extracts were treated with DMSO or Mirin. Immunoblotting was performed with anti-pT371, anti-TRF1 or anti- $\gamma$ -tubulin antibody.

**Figure 6.** Indirect immunofluorescence with anti-pT371 antibody on IR-treated Nbs1-deficient cells (NBS-ILB1) complemented with the vector alone or various Myc-tagged Nbs1 alleles as indicated. Cell nuclei were stained with DAPI in blue.

**Figure 7.** The formation of IR-induced (pT371)TRF1 foci is impaired in the breast cancer cell line HCC1937. **(A)** Indirect immunofluorescence with anti-pT371 antibody on IR-treated MCF7 (expressing functional BRCA1) or HCC1937 (lacking functional BRCA1) cells. Cell nuclei were stained with DAPI in blue. **(B)** Quantification of the percentage of cells with five or more IR-induced (pT371)TRF1 foci from (A). Standard deviations from three independent experiments are indicated. **(C)** Western analysis of MCF7 and HCC1937 cell extracts with anti-pT371, anti-TRF1, or anti- $\gamma$ -tubulin antibody.

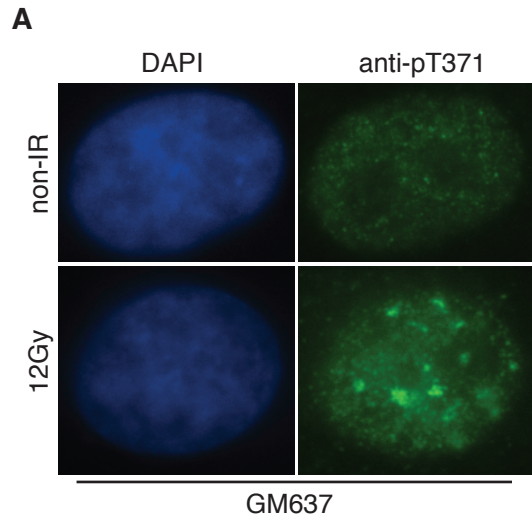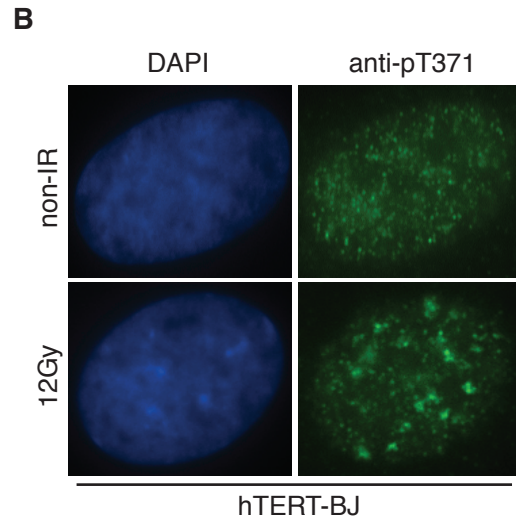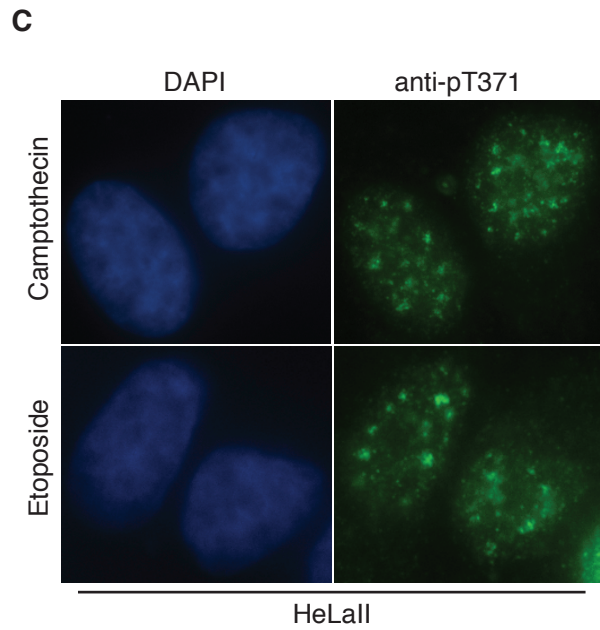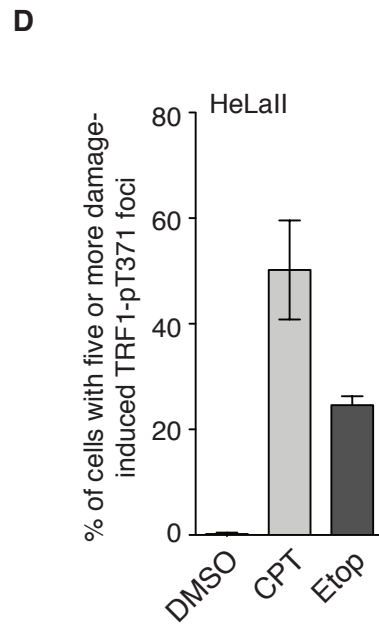



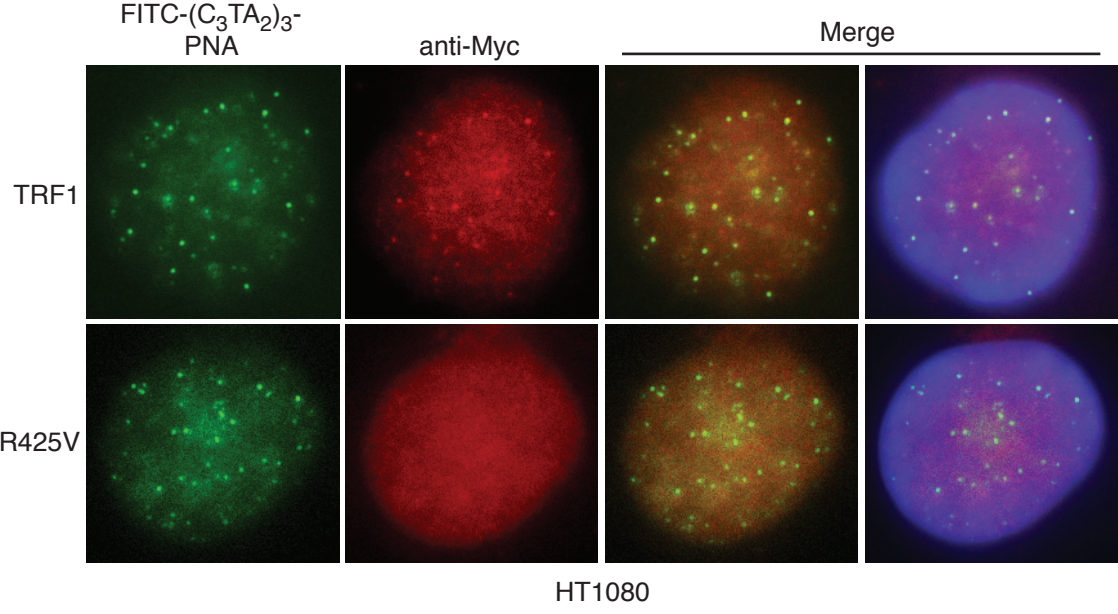

**A**

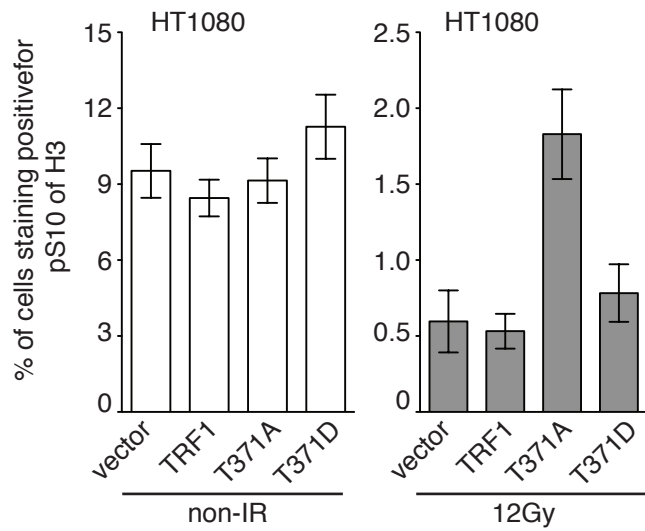

**B**

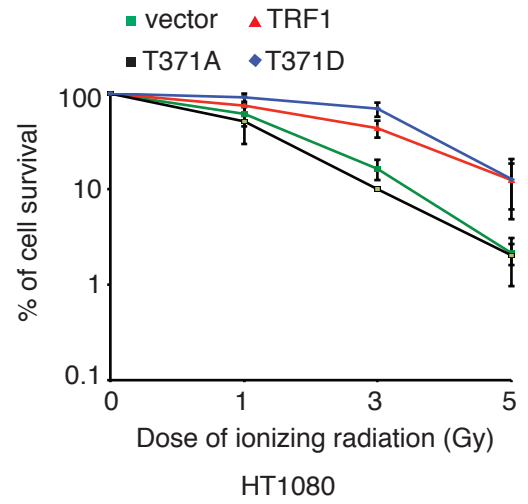

**C**

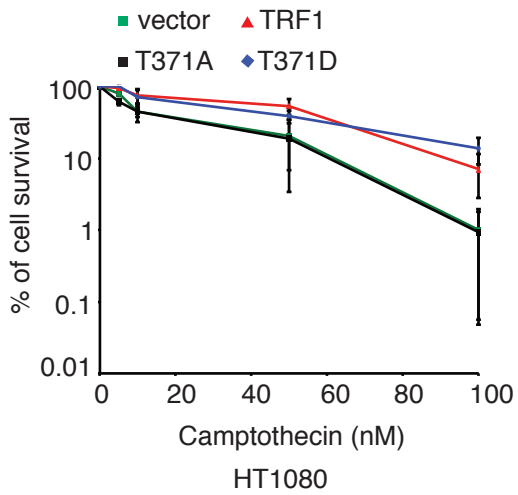

**D**

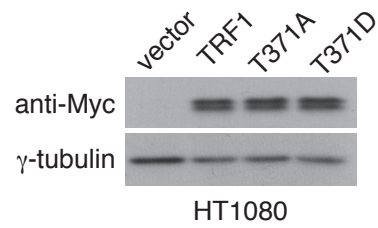

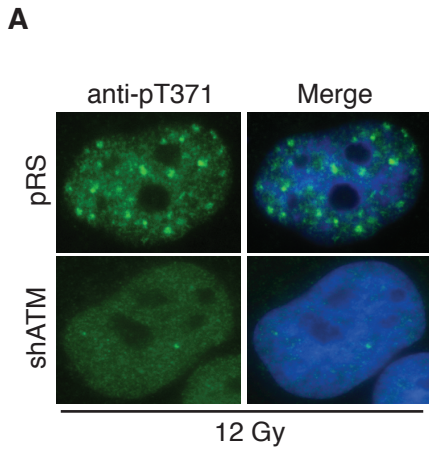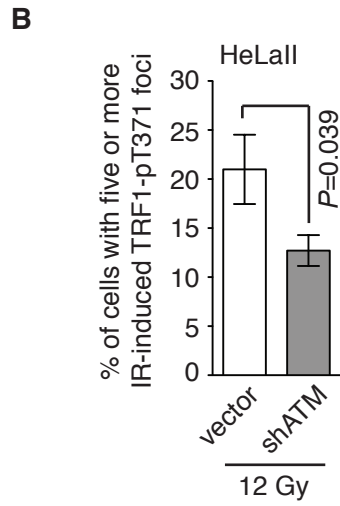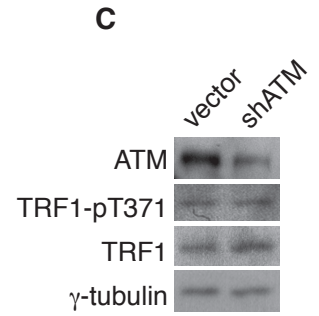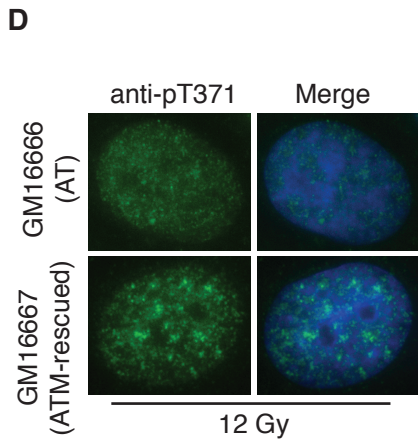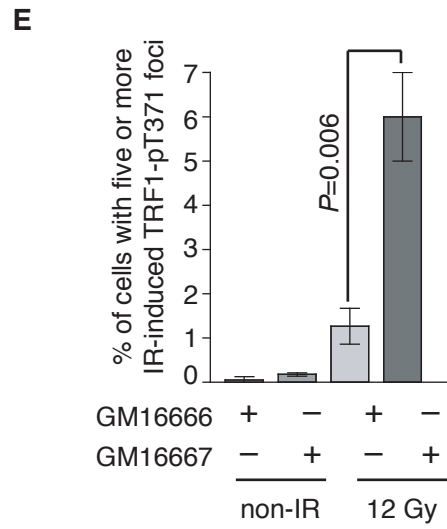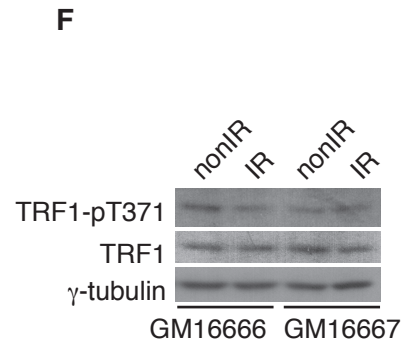

**A**

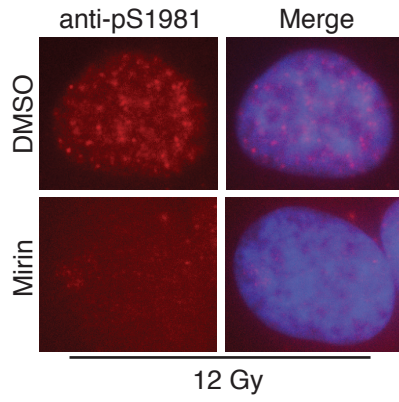

**B**

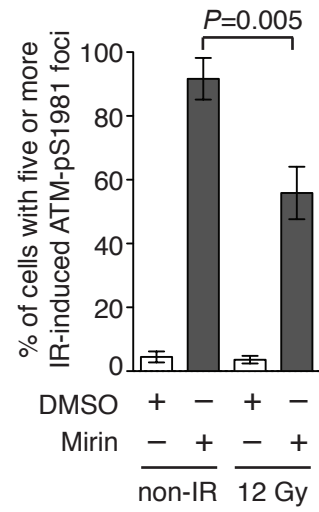

**C**

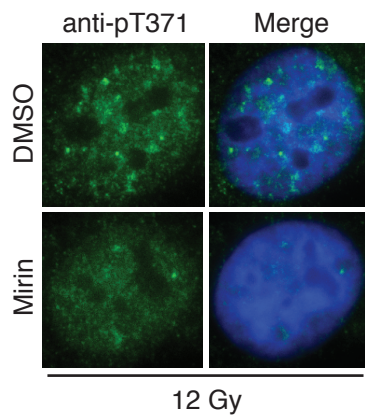

**D**

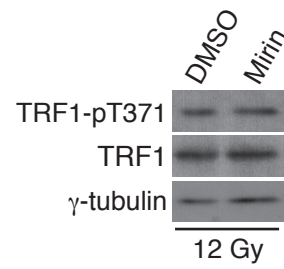

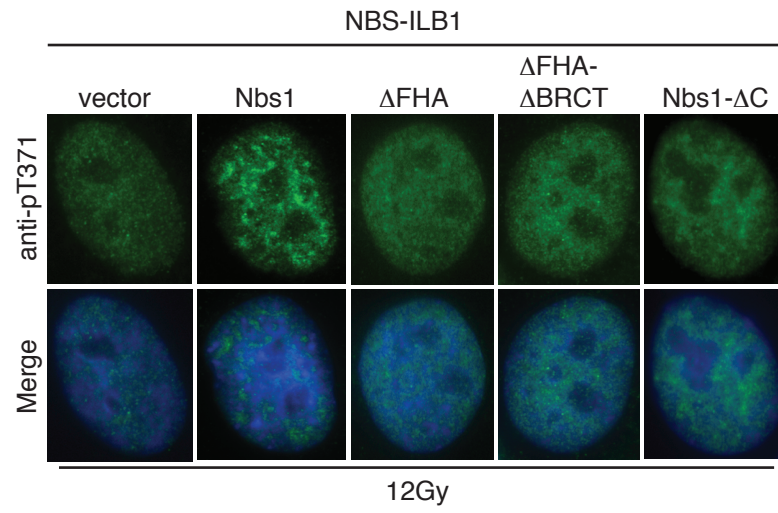

**A**

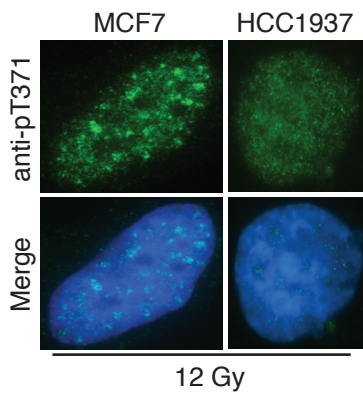

**B**

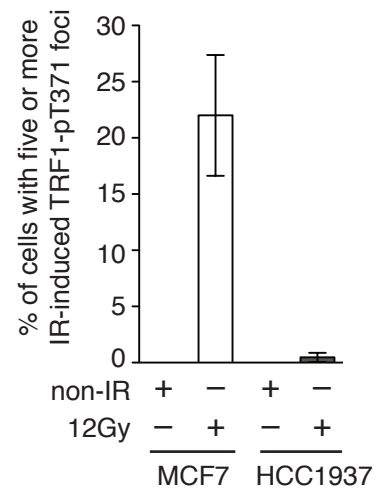

**C**

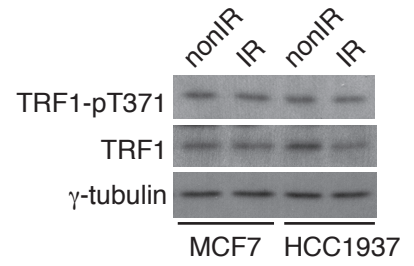

Supplement: supp_gkt775_nar-01698-d-2013-File009.pdf [file supp_gkt775_nar-01698-d-2013-File009.pdf]
